# Supplementary material
Source: PubMed Central journal article supplement (PMC3321596)

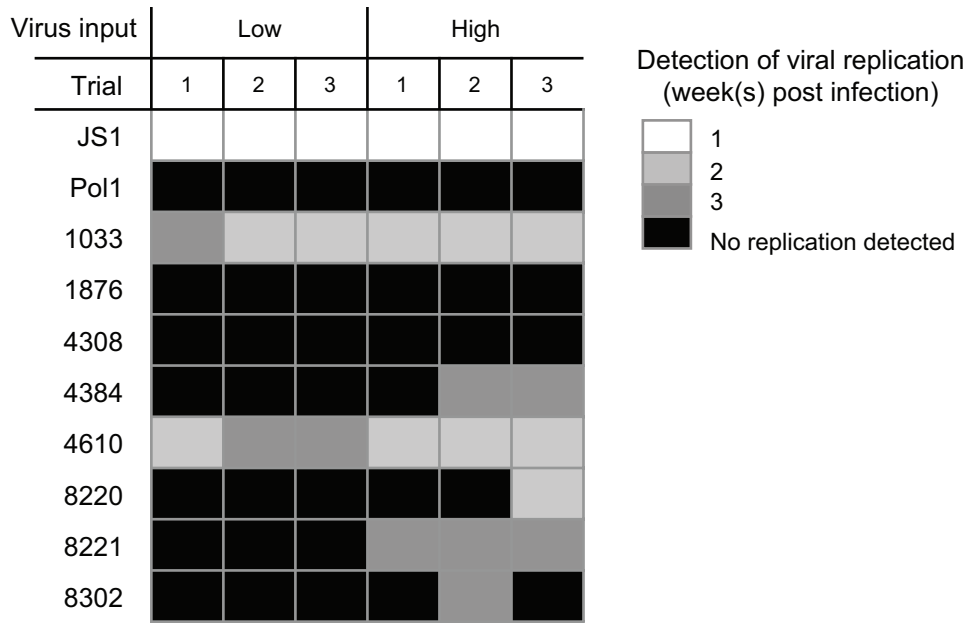

Supplement: mt2011299x2.pdf [file mt2011299x2.pdf]
